# Supplementary material
Source: PubMed Central journal article supplement (PMC4922893)
Supplement: 10-1055-s-0042-105747-sup_gf1053.pdf [file 10-1055-s-0042-105747-sup_gf1053.pdf]

# Ebnet der DMW den Weg zum Single Embryo Transfer? Eine retrospektive Datenerhebung des universitären interdisziplinären Kinderwunschzentrums Düsseldorf – UniKiD

The German Middleway as Precursor for Single Embryo Transfer. A Retrospective Data-analysis of the Düsseldorf University Hospital's Interdisciplinary Fertility Centre – UniKiD

## Autoren

T. K. Kliebisch<sup>1</sup>, A. P. Bielfeld<sup>2</sup>, J. S. Krüssel<sup>2</sup>, D. M. Baston-Büst<sup>2</sup>

## Institute

<sup>1</sup> Medical Research School der Medizinischen Fakultät der Heinrich-Heine-Universität, Düsseldorf

<sup>2</sup> Universitätsklinikum der Heinrich-Heine-Universität, Frauenklinik, Universitäres interdisziplinäres Kinderwunschzentrum Düsseldorf (UniKiD), Düsseldorf

## Schlüsselwörter

- ART
- Deutscher Mittelweg
- ESchG
- Blastozyste

## Key words

- ART
- German Middleway
- embryo protection act
- blastocyst

## Zusammenfassung

**Einleitung:** Deutsche Kinderwunschpatienten erscheinen im internationalen Vergleich aufgrund der restriktiven Vorgaben des Embryonenschutzgesetzes (ESchG) und des Verbots der Auswahl eines „Top-Embryos“ benachteiligt. Die Durchführung des Deutschen Mittelwegs (DMW) erlaubt nun eine liberale Interpretation des ESchG im Sinne der Kultur mehrerer Vorkernstadien (2PN-Stadien).

**Material und Methoden:** Retrospektive Kohortenstudie mit 2 Behandlungszyklen im Rahmen einer assistierten Reproduktion mit n=400 Patientinnen im Alter zwischen 21 und 45 Jahren, die entweder 2× konservativ oder 1× konservativ und 1× liberal nach DMW behandelt wurden.

**Ergebnisse:** Eine Schwangerschaft konnte in der DMW-Gruppe in 35% der Fälle, in der Kontrollgruppe in 31% erzielt werden. Die Geburtenrate lag in der Kontrollgruppe bei 28,5% und in der DMW-Gruppe bei 30,5%. Die meisten Schwangerschaften resultierten aus der Kultur von 4× 2PN-Stadien.

**Schlussfolgerung:** Im Vergleich zum Vorzyklus einer Patientin der DMW-Gruppe kam es zu signifikant höheren Schwangerschafts- und Geburtenraten bei gleichzeitig signifikant gestiegenem Alter und signifikant weniger transferierten Embryonen. Entscheidende Einflussfaktoren waren die Anzahl der generierten 2PN-Stadien und die Qualität der transferierten Embryonen. Somit ist davon auszugehen, dass gerade ältere Patientinnen mit einer ausreichenden ovariellen Reserve vom DMW bzw. vom Transfer von weniger Embryonen mit möglichst hoher Qualität profitieren.

## Abstract

**Introduction:** Patients receiving fertility treatment in Germany appear to be disadvantaged in comparison to those in other countries due to the restrictive Embryo Protection Act (“Embryonenschutzgesetz, ESchG”), which prohibits the selection of a “top” embryo. The so-called German Middleway (“Deutscher Mittelweg, DMW”) now provides for a liberal interpretation of the ESchG by allowing the culture of numerous pronuclear stages (2PN stage).

**Materials and Methods:** Retrospective cohort study of 2 assisted reproduction treatment cycles in n=400 patients between the ages of 21 and 45 years, either treated 2× conservatively or 1× conservatively and 1× liberally according to DMW.

**Results:** Pregnancy was achieved in 35% of patients in the DMW group and 31% of controls. The birth rate among controls was 28.5% and 30.5% in the DMW group. Most pregnancies resulted from the culture of 4× 2PN stages.

**Conclusion:** Patients in the DMW group had significantly higher pregnancy and birth rates compared to their previous cycles despite significantly increased age and significantly fewer transferred embryos. Key factors were the number of 2PNs generated and the quality of embryos transferred. Thus it can be assumed that particularly older patients with adequate ovarian reserves will benefit from DMW, i.e. the transfer of fewer embryos of the best possible quality.

**eingereicht** 4. 1. 2016

**revidiert** 9. 3. 2016

**akzeptiert** 29. 3. 2016

## Bibliografie

**DOI** <http://dx.doi.org/10.1055/s-0042-105747>  
Geburtsh Frauenheilk 2016; 76:  
1–10 © Georg Thieme  
Verlag KG Stuttgart · New York ·  
ISSN 0016-5751

## Korrespondenzadresse

**Dunja Maria Baston-Büst**  
Universitätsklinikum der  
Heinrich-Heine-Universität  
Frauenklinik  
Universitäres interdisziplinäres  
Kinderwunschzentrum  
Düsseldorf (UniKiD)  
Moorenstraße 5  
40225 Düsseldorf  
baston-buest@unikid.de

## Einleitung

▼  
Etwa 10% aller Paare im reproduktiven Alter sind von ungewollter Kinderlosigkeit betroffen [1]. Die deutsche Reproduktionsmedizin ist durch nationale gesetzliche Rahmenbedingungen wie dem Embryonenschutzgesetz (ESchG) und in manchen Landesärztekammerbereichen dem ärztlichen Berufsrecht im europäischen und internationalen Vergleich stärker reglementiert wenn es darum geht, neue Wege im Bereich der Reproduktionsmedizin einzuschlagen. In anderen Ländern, wie z. B. Belgien und Schweden, ist der „elective single embryo transfer“ (eSET), wobei ein einzelner Embryo aus allen in einem Stimulationszyklus generierten Embryonen ausgewählt und zurückgegeben wird, rechtlich möglich und vom Gesundheitswesen sogar gewünscht [2].

Da nach dem deutschen ESchG von 1990 keine Vorratsbefruchtungen zulässig sind, soll somit die regelhafte Entstehung überzähliger Embryonen vermieden werden [3]. Damit wird in Deutschland meist nicht die Kultur aller gewonnenen Eizellen während eines Behandlungszyklus durchgeführt, sondern es werden im südlichen Bundesgebiet seit ca. 2008/2009 im Sinne des Deutschen Mittelwegs (DMW) so viele Eizellen nach Rücksprache mit dem Paar über das 2-Pronukleus-Stadium (2PN-Stadium) hinaus kultiviert, um dann im Verlauf anhand der Entwicklung der einzelnen Embryonen 2 entwicklungsfähige identifizieren zu können [4]. Viele reproduktionsmedizinische Zentren kultivieren noch heute klassisch nach der sog. „Dreierregel“ und somit max.  $3 \times 2\text{PN}$ -Stadien, da einer Frau max. 3 Embryonen pro Zyklus übertragen werden dürfen [3]. Eine juristische Sichtweise ist, dass trotz dieser liberalen Auslegung des ESchG nicht dieselben Verhältnisse in Deutschland herrschen wie z. B. in vielen europäischen Nachbarländern, in denen die Kollegen häufig alle befruchteten Eizellen kultivieren, um gezielt nur einen optimal entwickelten Embryo zu transferieren. Bei dieser Auswahl des „Top-Embryos“ kommt es in den meisten Fällen zur Entstehung überzähliger Embryonen, sodass dieser sogenannte elektive Single Embryo Transfer (eSET) in Deutschland nicht durchgeführt werden könne [5]. Dieser Sachverhalt ist auf das seit 1991 bestehende ESchG zurückzuführen, das festlegt, keine Vorratsbefruchtungen zuzulassen und somit überzählige Embryonen zu vermeiden [3]. Aktuelle Daten zeigen allerdings eindrucksvoll, dass in 85% der untersuchten Stimulationszyklen nur 1–2 entwicklungsfähige Embryonen bei der Kultur von bis zu  $6 \times 2\text{PN}$  entstehen und somit der Sorge einer Embryonen-Vorratshaltung zu große Bedeutung zukommen mag [6].

Wenn nun die 3 wichtigsten Einflussfaktoren in Bezug auf das Eintreten einer Schwangerschaft betrachtet werden, nämlich das Alter der Patientin, die Anzahl der transferierten Embryonen und die „Qualität“ bzw. die Entwicklungsfähigkeit des Embryos, fällt auf, dass deutsche Reproduktionsmediziner bisher nur durch den Transfer mehrerer Embryonen gute Schwangerschaftsraten erzielen konnten, mit dem damit verbundenen Risiko von Mehrlingsschwangerschaften.

Dass dieses Risiko bspw. in der Gruppe der 30- bis 34-jährigen Patientinnen beim Transfer von 2 Embryonen besonders hoch ist, konnte der Jahresbericht des Deutschen IVF-Registers (DIR) 2013 zeigen, wobei 20,10% der Geburten in den Jahren 2000–2012 Zwillings- und 0,41% Drillingssgeburten waren [7].

Der DMW versucht nun, durch eine liberale Auslegung des ESchG auch in Deutschland die Behandlungsergebnisse zu verbessern, indem durch die In-vitro-Kultur mehrerer Embryonen versucht wird, diejenigen mit dem größten Entwicklungspotenzial aus-

zuwählen und der Patientin spätestens im Blastozystenstadium *gegebenenfalls* auch als Transfer eines einzelnen Embryos zurückzugeben.

In dem nachfolgenden Artikel soll dargelegt werden, inwieweit sich die Standardzyklen der künstlichen Befruchtung von dem Verfahren des „DMW“ unterscheiden und ob die Einführung des „DMW“ 2011 im UniKiD zu signifikant höheren Schwangerschaftsraten, weniger Mehrlingsschwangerschaften und somit zu einer deutlichen Reduktion der gesundheitlichen und monetären Belastung der behandelten Paare geführt hat. Besonderes Augenmerk legen wir auf die Frage, welche Patientengruppe überhaupt vom DMW profitieren kann bzw. welche Handlungsalgorithmen den Erfolg des DMW vorhersagen können. Dies ist insbesondere wichtig, um die Frage klären zu können, ob der im UniKiD, in den meisten anderen Zentren in Nordrhein und in mehreren Zentren im Bereich anderer Landesärztekammern angewandte DMW den Weg zum Single Embryo Transfer ebnen kann.

## Material und Methodik

### ▼ Beschreibung der Verfahren

Nach ausführlicher Anamnese des Paares, gynäkologischer Untersuchung und Bestimmung der relevanten Hormonparameter bei der Patientin sowie kompletter andrologischer Diagnostik beim Mann wurde die Indikation zur reproduktionsmedizinischen Therapie (In-vitro-Fertilisation [IVF] oder intrazytoplasmatische Spermiuminjektion [ICSI]) gestellt und Behandlungsabläufe, relevante Risiken und mögliche Komplikationen mit dem Paar besprochen. Daraufhin folgte die medikamentöse Vorbehandlung im Sinne eines kurzen/langen Agonistenprotokolls oder eines Antagonistenprotokolls mit hCG-Gabe zur Ovulationsinduktion und Eizellpunktion.

Nach der Befruchtung mittels IVF oder ICSI wurden im konservativen ART-Zyklus (Kontrollgruppe) max.  $3 \times 2\text{PN}$ -Stadien für eine 2–3-tägige Kultur bis zum Transfer eingesetzt, während im DMW-Zyklus max.  $6 \times 2\text{PN}$ -Stadien für eine 2–5-tägige In-vitro-Kultur gewählt wurden.

### Ein- und Ausschlusskriterien

In diese retrospektive Kohortenstudie wurden 400 Patientinnen im Alter von 21 bis 45 Jahren eingeschlossen, die im Rahmen einer assistierten Reproduktion (IVF oder ICSI) mind. 2-mal in den Jahren 2006–2013 behandelt wurden und entweder der Kontroll- ( $n=200$ , KG) oder der Experimentalgruppe ( $n=200$ , EG) zugeordnet wurden. Voraussetzung war außerdem, dass der betrachtete Behandlungszyklus nicht abgebrochen wurde. Betrachtet wurden die beiden letzten Behandlungen (1. Zyklus = KG1, 2. Zyklus = KG2 vs. 1. Zyklus = EG1 und 2. Zyklus = EG2 [im Folgenden wird EG2 als DMW bezeichnet]). Ausgeschlossen wurden Patientinnen, die nur im Sinne des DMW behandelt wurden, was vor allem in den Behandlungsjahren 2011–2013 dazu führte, dass viele der behandelten Patientinnen nicht in die Auswertung einfließen konnten.

Die Einschlusskriterien der EG entsprachen mind. einer Behandlung mit dem Standardverfahren (EG1) und einer mit dem DMW-Verfahren (DMW). Die Einschlusskriterien der KG entsprachen mind. 2 Standardzyklen (KG1 und KG2). Durch diesen Match der Gruppen war es nicht nur möglich, KG vs. EG zu vergleichen, sondern auch einen vorherigen Zyklus einer Patientin mit dem da-

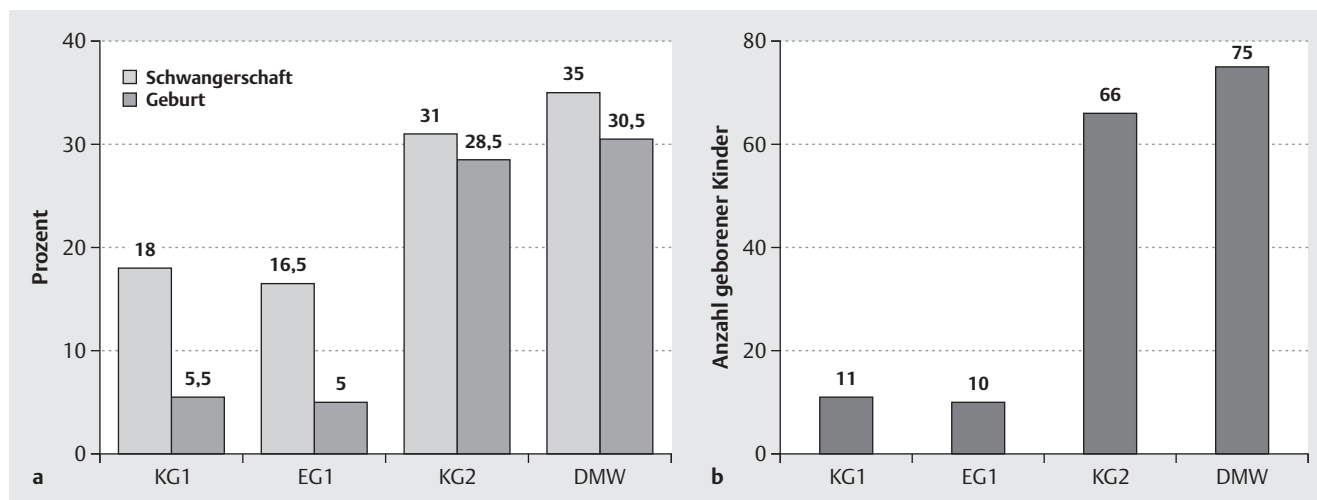

**Abb. 1 a und b** a Schwangerschafts- und Geburtenraten in den untersuchten Kollektiven. Dargestellt sind die Schwangerschafts- und Geburtenraten in den untersuchten Kollektiven mit der Kontrollgruppe (KG1 und 2 im ersten bzw. letzten konservativen Zyklus) und der Experimentalgruppe (EG1 zu-

nächst Behandlung im konservativen Schema, dann DMW). b Anzahl geborener Kinder in den Behandlungsgruppen. Die meisten Kinder wurden nach Behandlung im DMW-Schema geboren, gefolgt von der konservativen Behandlung.

rauffolgenden Zyklus derselben Patientin im Sinne einer internen Kontrolle zu untersuchen.

Bei einer Patientin, die bspw. der EG zugeordnet wurde und insgesamt 4-mal behandelt wurde, 2-mal mit jedem Verfahren, wurde nur der jeweils letzte Standard- und der letzte DMW-Zyklus mit allen Parametern erfasst. Wenn es sich um eine Patientin der KG handelte, wurden die beiden letzten Standardzyklen erfasst. Dieses Vorgehen wurde gewählt, um einer positiven Vorselektion des Patientenkollektivs vorzubeugen und Patientinnen mit unterschiedlich vielen Behandlungszyklen einheitlich zu untersuchen.

### Erfasste Parameter

Folgende Parameter wurden bei den Patientinnen betrachtet: Alter der Patientin, Anzahl Jahre des Kinderwunsches, Body-Mass-Index (BMI), die Anzahl bereits geborener Kinder, Aborte und Abrasionen, die andrologischen Befunde des Partners, die Art der Befruchtungsmethode (IVF oder ICSI), das Punktions- und Transferdatum und die Protokollart.

Zusätzlich bestimmt wurden:

- ▶ basale Hormonwerte zwischen 3. und 5. Zyklustag:
  - ▶ luteinisierendes Hormon (LH)
  - ▶ follikelstimulierendes Hormon (FSH)
  - ▶ Anti-Müller-Hormon (AMH)
  - ▶ thyroideastimulierendes Hormon (TSH)
  - ▶ Testosteron
  - ▶ Prolaktin
  - ▶ Dehydroepiandrosteron-Sulfat (DHEA-S)
  - ▶ LH/FSH-Quotient (berechnet)
- ▶ am Tag der Gabe von humanem Choriongonadotropin (hCG) zur Ovulationsinduktion:
  - ▶ Östradiol ( $E_2$ ) und
  - ▶ luteinisierendes Hormon (LH)

Dokumentiert und ausgewertet wurden zusätzlich:

- ▶ die Medikamente im Rahmen der Stimulation:
  - ▶ rekombinantes follikelstimulierendes Hormon (rFSH)
  - ▶ rekombinantes luteinisierendes Hormon (rLH)
  - ▶ HMG

- ▶ rekombinantes humanes Choriongonadotropin (rhCG)
- ▶ Corifollitropin alfa
- ▶ HCG
- ▶ Gonadotropin-Releasing-Hormon-Agonisten (GnRH-Agonisten)
- ▶ Gonadotropin-Releasing-Hormon-Antagonisten (GnRH-Antagonisten)
- ▶ ggf. Kontrazeptivum im Vorzyklus
- ▶ ggf. Schilddrüsenhormonsubstitution
- ▶ ggf. Gabe von Antikoagulanzen

Weitere betrachtete Parameter waren die Anzahl der punktierten Eizellen und deren Qualität im Verlauf der Behandlung (defekte Eizellen, Germinal-Vesikel [GV], 1. meiotische Teilung erreicht [MI], nachgereifte Eizellen [N], 2. meiotische Teilung erreicht [MII] und nach der Befruchtung [2PN]), die Anzahl der kryokonservierten 2PNER, der kultivierten 2PNER, der geplanten und transferierten Embryonen und die Qualität der Embryonen (Embryo-Grading). Der 1. hCG-Wert wurde 13 Tage nach dem Punktionsdatum bestimmt und weitere 7 Tage später der 2. hCG-Wert. Das Ergebnis des 1. Ultraschalls, eine eventuelle Gemini-Anlage mit ihren Besonderheiten wie Vanishing Twins und schließlich die Einzelheiten der Geburt (Schwangerschaftsdauer, Geschlecht, Gewicht, Auffälligkeiten, Modus) bzw. die Anzahl geborener Kinder wurden erhoben.

Zu den anamnestisch erhobenen Parametern gehörten Behandlungen außerhalb unseres Zentrums, abgebrochene Behandlungen in der Vorgeschichte mit dem jeweiligen Grund (Überstimulationssyndrom [OHSS], fehlende 2PNER); Anzahl der Zyklen mit Geschlechtsverkehr zum optimalen Zeitpunkt (VZO), der intrauterinen Inseminationen (IUI), der In-vitro-Fertilisationen (IVF), der intrazytoplasmatischen Spermieninjektionen (ICSI), der Kryotransfers; demografische Faktoren wie Familienstand und Nikotinkonsum; gynäkologische Behandlungen wie Laparoskopien (LSK), Hysteroskopien (HSK), Chromoperturbationen; gynäkologische Krankheitsbilder wie Endometriose, Myome, das Syndrom der polyzystischen Ovarien (PCO) und Lage der Gebärmutter.

## Statistische Analyse

Die Berechnungen und statistischen bzw. deskriptiven Analysen dieser Arbeit wurden mit dem Statistikprogramm IBM SPSS Statistics Version 22.0.0.0 und unter Nutzung der fachlichen Expertise der .05 Statistikberatung Düsseldorf durchgeführt.

Zur statistischen Auswertung wurden der T-Test und der Levene-Test (Vergleich von Mittelwerten) verwendet, außerdem der  $\chi^2$ -Test nach Pearson, Mann-Whitney-Test und Wilcoxon-Test (Gruppenanalysen) und ANOVA-Analysen (lineare Regressionsanalysen) bzw. der Omnibus-Test (logistische Regressionsanalysen). Zusätzlich wurden Korrelationsanalysen durchgeführt. Als statistisch signifikant galt ein  $p < 0,05$ .

## Ergebnisse

### Deskriptive Statistik der Hauptzielgrößen

Bei den Hauptzielgrößen handelte es sich um die Schwangerschaftsrate (fortlaufende Schwangerschaft mit ansteigendem hCG und positivem Ergebnis im 1. Ultraschall), Geburtenrate (Geburt eines oder mehrerer Kinder) und die absolute Anzahl geborener Kinder.

Eine Schwangerschaft konnte in KG1 in 18% (1. hCG  $\bar{x}$  [Mittelwert] = 152 mU/ml, 2. hCG  $\bar{x}$  = 2373 mU/ml,  $n = 36$ ), in EG1 in 16,5% (1. hCG  $\bar{x}$  = 86 mU/ml, 2. hCG  $\bar{x}$  = 1384 mU/ml,  $n = 33$ ), in KG2 in 31% (1. hCG  $\bar{x}$  = 146 mU/ml, 2. hCG  $\bar{x}$  = 2366 mU/ml,  $n = 62$ ) und in der DMW-Gruppe in 35% (1. hCG  $\bar{x}$  = 222 mU/ml, 2. hCG  $\bar{x}$  = 2530 mU/ml,  $n = 70$ ) der Fälle erzielt werden.

Die Geburtenrate entsprach der Anzahl geborener Kinder in KG1 und lag bei 5,5% (11 von  $n = 200$  Punktionen) und in EG1 bei 5% (10 von  $n = 200$ ). Die Geburtenrate in KG2 lag bei 28,5% (57 von  $n = 200$ ) und die absolute Anzahl geborener Kinder bei 66. In der DMW-Gruppe lag die Geburtenrate bei 30,5% (61 von  $n = 200$ ) und die absolute Anzahl geborener Kinder betrug 75.

Grafisch dargestellt sind die Hauptzielgrößen (Schwangerschaftsrate, Geburtenrate, Anzahl geborener Kinder) in **Abb. 1 a** und **b**. Eingeschlossen in die Auswertung wurden nur Patientinnen, die entweder im 1. oder 2. Zyklus eine fortlaufende Schwangerschaft erreicht haben. Biochemische Schwangerschaften wurden nicht berücksichtigt.

### Darstellung der Gruppengleichheit und gleichbleibende Parameter KG gegen EG

Diese Parameter beziehen sich auf das Ende der Datenerhebung und somit nicht auf einen einzelnen Behandlungszyklus der Patientin. Es wurde nur zwischen KG und EG unterschieden, um die Gleichheit der Gruppen darzustellen.

Es konnte nachgewiesen werden, dass sich KG und EG hinsichtlich der Gesamtanzahl der ART-Zyklen (IVF und ICSI), des VZO, der IUI, der Anzahl der Kryotransfers, des Rauchverhaltens, dem Auftreten eines OHSS, fehlender 2PN-Zellen, abgebrochener Behandlungen, Familienstand, Auftreten von Endometriose, HSKs, Chromoperturbationen, dem Vorhandensein von Myomen, Uteruslage und dem Auftreten von PCO in der Anamnese nicht signifikant unterschieden.

Signifikant unterschieden sich die Gruppen jedoch hinsichtlich der Anzahl der DMW-Zyklen ( $EG = 1,44 \pm 0,77$ ,  $p = 0,000$ ), da nur in der EG der DMW angewendet wurde, außerdem hinsichtlich der Anzahl der Kryotransfers ( $KG = 1,05 \pm 1,39$ ,  $EG = 1,61 \pm 1,82$ ,  $p = 0,001$ ) und der Anzahl der LSKs in der Anamnese ( $KG = 30,5\%$ ,  $EG = 40\%$ ,  $p = 0,047$ ).

### Darstellung der Gruppengleichheit und Vergleich des 1. Zyklus KG1 gegen EG1

Im Rahmen des 1. Zyklus wurden beide Gruppen im Sinne des Standardverfahrens behandelt, wodurch auch hier die Gruppengleichheit nachgewiesen werden konnte. In Bezug auf das Alter; BMI; E<sub>2</sub>- und LH-Wert bei hCG-Gabe; die Gabe von rFSH, rFSH + rLH, GnRH-Agonisten und -Antagonisten; Laborwerte (LH/FSH, AMH, TSH, Testosteron, LH, DHEA); Anzahl Eizellen MI; kultivierte 2PN; transferierte und kultivierte Embryonen; 2. hCG; der Differenz zwischen Punktions- und Transfer- und Transfer- und Geburtstag; der Qualität des 1., 2. und 3. Embryos; dem Ergebnis des 1. Ultraschalls und der Schwangerschafts- und Geburtenrate, sowie der Anzahl geborener Kinder, konnte bewiesen werden, dass sich die Gruppen nicht signifikant voneinander unterscheiden.

Signifikant unterschieden sich die Gruppen in Bezug auf die Gabe von FSH ( $KG = 2509 \pm 1357$  IE,  $EG = 2070 \pm 1058$  IE,  $p = 0,0003$ ), den Prolaktin-Wert ( $KG = 14,52 \pm 7,34$ ,  $EG = 16,18 \pm 7,54$ ,  $p = 0,031$ ), den FSH-Wert ( $KG = 8,32 \pm 4,14$ ,  $EG = 7,24 \pm 3,48$ ,  $p = 0,006$ ), die Anzahl der punktierten Eizellen ( $KG = 7,75 \pm 3,82$ ,  $EG = 9,12 \pm 4,05$ ,  $p = 0,001$ ), Eizellen MII ( $KG = 6,02 \pm 3,38$ ,  $EG = 7,21 \pm 3,60$ ,  $p = 0,001$ ), 2PN ( $KG = 3,77 \pm 2,47$ ,  $EG = 4,88 \pm 2,88$ ,  $p = 0,001$ ), kryokonservierte 2PN ( $KG = 1,40 \pm 2,20$ ,  $EG = 2,46 \pm 2,91$ ,  $p = 0,000$ ), 1. hCG ( $KG = 151,58 \pm 181,95$ ,  $EG = 83,43 \pm 59,86$ ,  $p = 0,046$ ) und die ART-Form ( $KG = 88,5\%$  ICSI,  $EG = 80\%$  ICSI,  $p = 0,020$ ).

### Gruppenvergleich und Vergleich des 2. Zyklus KG2 gegen EG2 (DMW)

Die Hauptzielgrößen unterschieden sich nicht signifikant voneinander, dennoch konnten höhere Schwangerschaftsraten (+4%), Geburtenraten (+2%) und eine größere Anzahl geborener Kinder (+9) erzielt werden, obwohl signifikant weniger Embryonen transferiert wurden ( $KG = 1,96 \pm 0,62$ ,  $EG = 1,83 \pm 0,38$ ,  $p = 0,009$ ) (**Tab. 1**).

### Gruppenvergleich und Vergleich des 1. mit dem 2. Zyklus einer Patientin EG1 gegen EG2 (DMW)

Da es sich bei diesem Vergleich um unterschiedliche Zyklen einer individuellen Patientin handelte, einmal im Standardverfahren (EG1) und einmal im DMW-Verfahren (EG2), konnte dargestellt werden, dass die Patientinnen signifikant von dem neuen Verfahren profitieren konnten, trotz des zwangsläufig signifikant steigenden Alters der Patientinnen ( $EG1 = 35,43 \pm 3,99$ ,  $EG2 = 36,45 \pm 3,86$ ,  $p = 0,000$ ). Es konnten signifikant höhere Schwangerschaftsraten (+18,5%) und höhere Geburtenraten (+25,5%) erzielt werden, obwohl signifikant weniger Embryonen transferiert wurden ( $EG1 = 1,97 \pm 0,46$ ,  $EG2 = 1,83 \pm 0,38$ ,  $p = 0,000$ ) (**Tab. 2**).

### Regressionsanalysen EG1, KG2 und EG2 (DMW)

#### Einfluss der Embryonenqualität auf eine eingetretene Schwangerschaft

Die Berechnung einer multiplen logistischen Regression mit der Qualität (A bis C) des 1., 2. und 3. transferierten Embryos als Prädiktoren zur Vorhersage einer eingetretenen Schwangerschaft erfolgte ebenfalls.

In EG1 lag die Gesamtvarianzaufklärung der multiplen logistischen Regression bei  $\chi^2(6) = 19,9$ ,  $p < 0,01$ . Signifikanter Prädiktor war die Qualität des 2. Embryos ( $p < 0,05$ ).

**Tab. 1** Demografische Angaben und deskriptive Statistik unter Angabe der Anzahl der Patienten (n) für DMW-Gruppe gegen konservative Behandlung (KG2). Darstellung von Mittelwerten  $\pm$  Standardabweichung oder Prozentangaben, in Klammern werden absolute Häufigkeiten angegeben mit  $p < 0,05$ .

|                                                                | KG2 (n = 200)                | DMW (n = 200)               | p-Wert |
|----------------------------------------------------------------|------------------------------|-----------------------------|--------|
| Alter                                                          | 36,94 $\pm$ 4,03 (200)       | 36,45 $\pm$ 3,86 (200)      |        |
| BMI                                                            | 23,39 $\pm$ 4,01 (199)       | 22,88 $\pm$ 3,91 (200)      |        |
| E <sub>2</sub> bei hCG-Gabe in pg/ml                           | 1827 $\pm$ 1 358 (200)       | 1 702 $\pm$ 1 124 (200)     |        |
| LH bei hCG-Gabe in $\mu$ U/ml                                  | 3,90 $\pm$ 2,84 (200)        | 3,34 $\pm$ 3,18 (200)       |        |
| Gesamtdosis FSH in IE                                          | 2 505 $\pm$ 1 419 (200)      | 1 987 $\pm$ 1 158 (200)     | < 0,05 |
| GnRH-Antagonist in mg                                          | 0,52 $\pm$ 0,76 (70)         | 0,77 $\pm$ 0,81 (103)       | < 0,05 |
| GnRH-Agonist in mg                                             | 4,93 $\pm$ 4,09 (128)        | 3,30 $\pm$ 3,70 (97)        |        |
| LH/FSH-Quotient in $\mu$ U/ml                                  | 0,87 $\pm$ 0,44 (193)        | 0,90 $\pm$ 0,38 (191)       |        |
| AMH in $\mu$ g/l                                               | 2,00 $\pm$ 2,76 (124)        | 1,99 $\pm$ 1,98 (169)       |        |
| TSH in $\mu$ U/ml                                              | 1,72 $\pm$ 0,82 (197)        | 1,92 $\pm$ 1,87 (193)       |        |
| Testosteron in ng/ml                                           | 0,27 $\pm$ 0,18 (195)        | 0,25 $\pm$ 0,16 (190)       |        |
| Prolaktin in ng/ml                                             | 15,14 $\pm$ 12,09 (190)      | 15,83 $\pm$ 7,57 (190)      |        |
| FSH in $\mu$ U/ml                                              | 8,32 $\pm$ 4,02 (193)        | 7,04 $\pm$ 2,32 (192)       | < 0,05 |
| LH in $\mu$ U/ml                                               | 6,27 $\pm$ 2,54 (196)        | 6,05 $\pm$ 2,51 (194)       |        |
| DHEA in $\mu$ g/l                                              | 141,24 $\pm$ 69,87 (191)     | 151,34 $\pm$ 70,85 (192)    |        |
| Eizellenanzahl                                                 | 7,6 $\pm$ 4,36 (200)         | 9,89 $\pm$ 3,96 (200)       | < 0,05 |
| Eizellen MI                                                    | 0,87 $\pm$ 1,16 (104)        | 0,99 $\pm$ 1,33 (102)       |        |
| Eizellen MII                                                   | 5,84 $\pm$ 3,59 (200)        | 7,88 $\pm$ 3,50 (200)       | < 0,05 |
| 2PN                                                            | 3,82 $\pm$ 2,68 (200)        | 5,36 $\pm$ 2,90 (200)       | < 0,05 |
| für die Kultur geplante 2PN                                    | 2,22 $\pm$ 0,49 (200)        | 5,18 $\pm$ 0,95 (200)       | < 0,05 |
| kultivierte 2PN                                                | 2,01 $\pm$ 0,63 (200)        | 3,96 $\pm$ 1,40 (200)       | < 0,05 |
| transferierte Embryonen                                        | 1,96 $\pm$ 0,62 (200)        | 1,83 $\pm$ 0,38 (200)       | < 0,05 |
| 1. hCG in mU/ml                                                | 145,78 $\pm$ 122,59 (62)     | 221,52 $\pm$ 458,98 (62)    |        |
| 2. hCG in mU/ml                                                | 2 365,75 $\pm$ 1 740,55 (62) | 2 529,6 $\pm$ 1 915,91 (62) |        |
| Differenz zwischen Punktion und Transfer (Transfertestag)      | 2,31 $\pm$ 0,46 (200)        | 3,93 $\pm$ 1,18 (200)       | < 0,05 |
| Differenz zwischen Transfer und Geburt (Schwangerschaftsdauer) | 254,95 $\pm$ 15,39 (57)      | 245,56 $\pm$ 23,20 (61)     | < 0,05 |
| Qualität, 1. Embryo                                            | (200)                        | (198)                       | < 0,05 |
| ▶ A                                                            | 48% (96)                     | 67,5% (135)                 |        |
| ▶ B                                                            | 43% (86)                     | 22% (44)                    |        |
| ▶ C                                                            | 9% (18)                      | 9,5% (19)                   |        |
| Qualität, 2. Embryo                                            | (156)                        | (161)                       |        |
| ▶ A                                                            | 32,5% (64)                   | 43,5% (87)                  |        |
| ▶ B                                                            | 34,5% (69)                   | 21% (42)                    |        |
| ▶ C                                                            | 11,5% (23)                   | 16% (32)                    |        |
| Qualität, 3. Embryo                                            | (33)                         | (0)                         | < 0,05 |
| ▶ A                                                            | 24% (8)                      |                             |        |
| ▶ B                                                            | 55% (18)                     |                             |        |
| ▶ C                                                            | 21% (7)                      |                             |        |
| Blastozysten (A) und Morulastadien (C) bei Qualität enthalten  |                              |                             |        |
| ART-Form (ICSI)                                                | 92% (184)                    | 81,5% (163)                 | < 0,05 |
| ▶ 1. US                                                        | (62)                         | (70)                        |        |
| ▶ Einling                                                      | 74% (46)                     | 71% (50)                    |        |
| ▶ Zwilling                                                     | 21% (13)                     | 23% (16)                    |        |
| ▶ Abort                                                        | 5% (3)                       | 6% (4)                      |        |
| Schwangerschaft                                                | 31% (62)                     | 35% (70)                    |        |
| Geburt                                                         | 28,5% (57)                   | 30,5% (61)                  |        |
| Anzahl geborener Kinder                                        | 66                           | 75                          |        |

Die Gesamtvarianzaufklärung der multiplen logistischen Regression in KG2 lag bei  $\chi^2(6) = 28,13$ ,  $p < 0,01$ , wobei sich als signifikante Prädiktoren die Qualität des 1. Embryos ( $p < 0,01$ ) und die des 2. Embryos ( $p < 0,01$ ) erwiesen haben. Währenddessen konnte in EG2 kein signifikanter Zusammenhang dargestellt werden.

#### Einfluss des Ultraschallergebnisses auf eine Geburt

In EG1 ( $\chi^2[3] = 106,77$ ,  $p < 0,01$ ), KG2 ( $\chi^2[3] = 190,67$ ,  $p < 0,01$ ) und EG2 ( $\chi^2[3] = 178,77$ ,  $p < 0,01$ ) konnte der 1. Ultraschall als signifikanter Prädiktor für die Vorhersage einer Geburt bestimmt werden.

#### Regressionsanalysen EG2 (DMW)

**Einfluss kultivierter 2PN-Stadien und des Alters der Patientinnen auf die Anzahl der generierten Blastozysten**  
Die Gesamtvarianzaufklärung der multiplen linearen Regression lag bei  $R^2 = 0,25$  ( $F = 32,67$ ,  $p < 0,01$ ). Als signifikanter Prädiktor hat sich die Anzahl kultivierter 2PN-Zellen ( $\beta = 0,49$ ,  $p < 0,01$ ) erwiesen.

#### Einfluss der Anzahl kultivierter 2PN-Stadien auf das 1. Ultraschallergebnis in der 7. SSW

In KG2 kam es insges. in 23% zu intakten Einlingsgraviditäten. 2,5% traten nach der Kultur von 1, 14% bei der Kultur von 2 und

**Tab. 2** Demografische Angaben und deskriptive Statistik unter Angabe der Anzahl der Patienten (n) für Patientinnen, für die im zweiten Zyklus das DMW-Verfahren angewendet wurde. Darstellung von Mittelwerten  $\pm$  Standardabweichung oder Prozentangaben, in Klammern werden absolute Häufigkeiten angegeben mit  $p < 0,05$ .

|                                                                | EG1                          | DMW                         | p-Wert |
|----------------------------------------------------------------|------------------------------|-----------------------------|--------|
| Alter                                                          | 35,43 $\pm$ 3,99 (200)       | 36,45 $\pm$ 3,86 (200)      | < 0,05 |
| BMI                                                            | 22,83 $\pm$ 3,98 (200)       | 22,88 $\pm$ 3,91 (200)      |        |
| E <sub>2</sub> bei hCG-Gabe in pg/ml                           | 1976 $\pm$ 1 292 (197)       | 1 702 $\pm$ 1 124 (200)     | < 0,05 |
| LH bei hCG-Gabe in $\mu$ U/ml                                  | 3,91 $\pm$ 3,50 (197)        | 3,34 $\pm$ 3,18 (200)       |        |
| Gesamtdosis FSH in IE                                          | 2 070 $\pm$ 1 058 (200)      | 1 987 $\pm$ 1 158 (200)     |        |
| GnRH-Antagonist                                                | 0,44 $\pm$ 0,70 (69)         | 0,77 $\pm$ 0,81 (103)       | < 0,05 |
| GnRH-Agonist                                                   | 5,28 $\pm$ 3,93 (141)        | 3,30 $\pm$ 3,70 (97)        | < 0,05 |
| LH/FSH-Quotient in $\mu$ U/ml                                  | 0,93 $\pm$ 0,48 (192)        | 0,90 $\pm$ 0,38 (191)       |        |
| AMH in $\mu$ g/l                                               | 2,20 $\pm$ 1,98 (192)        | 1,99 $\pm$ 1,98 (169)       | < 0,05 |
| TSH in $\mu$ U/ml                                              | 1,87 $\pm$ 0,98 (193)        | 1,92 $\pm$ 1,87 (193)       |        |
| Testosteron in ng/ml                                           | 0,26 $\pm$ 0,17 (190)        | 0,25 $\pm$ 0,16 (190)       | < 0,05 |
| Prolaktin in ng/ml                                             | 16,18 $\pm$ 7,54 (190)       | 15,83 $\pm$ 7,57 (190)      |        |
| FSH in $\mu$ U/ml                                              | 7,24 $\pm$ 3,48 (192)        | 7,04 $\pm$ 2,32 (192)       |        |
| LH in $\mu$ U/ml                                               | 6,41 $\pm$ 3,97 (194)        | 6,05 $\pm$ 2,51 (194)       |        |
| DHEA-S in $\mu$ g/l                                            | 152,07 $\pm$ 71,79 (191)     | 151,34 $\pm$ 70,85 (192)    |        |
| Eizellanzahl                                                   | 9,12 $\pm$ 4,05 (200)        | 9,89 $\pm$ 3,96 (200)       | < 0,05 |
| Eizellen MI                                                    | 0,85 $\pm$ 1,17 (98)         | 0,99 $\pm$ 1,33 (102)       |        |
| Eizellen MII                                                   | 7,21 $\pm$ 3,60 (197)        | 7,88 $\pm$ 3,50 (200)       | < 0,05 |
| für die Kultur geplante 2PN                                    | 2,11 $\pm$ 0,37 (200)        | 5,18 $\pm$ 0,95 (200)       | < 0,05 |
| kryokonservierte 2PN                                           | 2,46 $\pm$ 2,91 (108)        | 1,06 $\pm$ 2,08 (53)        | < 0,05 |
| kultivierte 2PN                                                | 2,03 $\pm$ 0,49 (199)        | 3,96 $\pm$ 1,40 (200)       | < 0,05 |
| transferierte Embryonen                                        | 1,97 $\pm$ 0,46 (200)        | 1,83 $\pm$ 0,38 (200)       | < 0,05 |
| 1. hCG in mU/ml                                                | 83,43 $\pm$ 59,86 (36)       | 221,52 $\pm$ 458,98 (62)    | < 0,05 |
| 2. hCG in mU/ml                                                | 1 513,13 $\pm$ 1 327,49 (36) | 2 529,6 $\pm$ 1 915,91 (62) | < 0,05 |
| Differenz zwischen Punktion und Transfer (Transfertestag)      | 2,35 $\pm$ 0,48 (200)        | 3,93 $\pm$ 1,18 (200)       | < 0,05 |
| Differenz zwischen Transfer und Geburt (Schwangerschaftsdauer) | 252,9 $\pm$ 12,78 (10)       | 245,56 $\pm$ 23,20 (61)     |        |
| Qualität, 1. Embryo                                            | (200)                        | (198)                       | < 0,05 |
| ▶ A                                                            | 52% (104)                    | 67,5% (135)                 |        |
| ▶ B                                                            | 39,5% (79)                   | 22% (44)                    |        |
| ▶ C                                                            | 8,5% (17)                    | 9,5% (19)                   |        |
| Qualität, 2. Embryo                                            | (175)                        | (161)                       |        |
| ▶ A                                                            | 27% (54)                     | 43,5% (87)                  |        |
| ▶ B                                                            | 46% (92)                     | 21% (42)                    |        |
| ▶ C                                                            | 12,5% (25)                   | 16% (32)                    |        |
| Qualität, 3. Embryo                                            | (20)                         | (0)                         | < 0,05 |
| ▶ A                                                            | 25% (5)                      |                             |        |
| ▶ B                                                            | 50% (10)                     |                             |        |
| ▶ C                                                            | 25% (5)                      |                             |        |
| Blastozysten (A) und Morulastadien (C) bei Qualität enthalten. |                              |                             |        |
| ART-Form (ICSI)                                                | 80% (160)                    | 81,5% (163)                 | < 0,05 |
| ▶ 1. US                                                        | (33)                         | (70)                        |        |
| ▶ Einling                                                      | 42% (14)                     | 71% (50)                    |        |
| ▶ Zwilling                                                     | 12% (4)                      | 23% (16)                    |        |
| ▶ Abort                                                        | 46% (15)                     | 6% (4)                      |        |
| Schwangerschaft                                                | 16,5% (33)                   | 35% (70)                    | < 0,05 |
| Geburt                                                         | 5% (10)                      | 30,5% (61)                  | < 0,05 |
| Anzahl geborener Kinder                                        | 10                           | 75                          | < 0,05 |

6,5% bei der Kultur von 3  $\times$  2PN-Stadien auf. Es kam außerdem zu 6,5% intakten Geminigraviditäten, die sich zu 6% auf die Kultur von 2 und zu 0,5% auf die Kultur von 3  $\times$  2PN-Stadien verteilten. In EG2 kam es in 24,5% der Fälle zu einer Einlingsgravidität, wobei 1% nach der Kultur von 1, 2% bei der Kultur von 2, 2,5% bei der Kultur von 3, 7,5% bei der Kultur von 4, 7% bei der Kultur von 5 und 4,5% bei der Kultur von 6 2PN-Stadien eintraten. Die Rate von 8% an Geminigraviditäten verteilte sich zu 0,5% auf die Kultur von 2, zu 6,5% auf die Kultur von 4 und zu jeweils 0,5% auf die Kultur von 5 bzw. 6  $\times$  2PN-Stadien (● Tab. 3).

## Diskussion

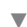

Die Einführung des DMW ist ein weiterer Schritt, trotz der restriktiven deutschen Gesetzgebung die Schwangerschaftsraten im Rahmen der ART zu erhöhen. Wir konnten darlegen, dass dieselbe Patientin vom neuen Verfahren signifikant profitieren kann. In Bezug zum vorangegangenen Therapiezyklus wurden signifikant höhere Schwangerschafts- und Geburtenraten erzielt und das, obwohl die Patientinnen signifikant älter waren und signifikant weniger Embryonen transferiert wurden. Hier zeigte sich deutlich, dass letzten Endes die Anzahl der generierten

**Tab. 3** Kreuztabelle. Darstellung des 1. Ultraschallergebnisses in der 7. SSW abhängig von der Anzahl der kultivierten 2PNER in KG2 und DMW.

| Anzahl kultivierter 2PNER (2. Zyklus) × 1. Ultraschall (2. Zyklus) |                           |                           |          | 1. Ultraschall (2. Zyklus) |                 |                  |       | Total  |
|--------------------------------------------------------------------|---------------------------|---------------------------|----------|----------------------------|-----------------|------------------|-------|--------|
| KG2 und DMW                                                        |                           |                           |          | kein Ultraschall           | intakt, Einling | intakt, Zwilling | Abort |        |
| KG2                                                                | Anzahl kultivierter 2PNER | 1                         | Anzahl   | 34                         | 5               | 0                | 0     | 39     |
|                                                                    |                           |                           | % gesamt | 17,0%                      | 2,5%            | 0,0%             | 0,0%  | 19,5%  |
|                                                                    | 2                         | Anzahl                    | 78       | 28                         | 12              | 3                |       | 121    |
|                                                                    |                           |                           | % gesamt | 39,0%                      | 14,0%           | 6,0%             | 1,5%  | 60,5%  |
|                                                                    | 3                         | Anzahl                    | 26       | 13                         | 1               | 0                |       | 40     |
|                                                                    |                           |                           | % gesamt | 13,0%                      | 6,5%            | 0,5%             | 0,0%  | 20,0%  |
|                                                                    | Total                     | Anzahl                    | 138      | 46                         | 13              | 3                |       | 200    |
|                                                                    |                           |                           | % gesamt | 69,0%                      | 23,0%           | 6,5%             | 1,5%  | 100,0% |
|                                                                    | DMW                       | Anzahl kultivierter 2PNER | 1        | Anzahl                     | 7               | 2                | 0     | 9      |
|                                                                    |                           |                           | % gesamt | 3,5%                       | 1,0%            | 0,0%             | 0,0%  | 4,5%   |
| DMW                                                                | 2                         | Anzahl                    | 24       | 4                          | 1               | 0                |       | 29     |
|                                                                    |                           |                           | % gesamt | 12,0%                      | 2,0%            | 0,5%             | 0,0%  | 14,5%  |
|                                                                    | 3                         | Anzahl                    | 20       | 5                          | 0               | 0                |       | 25     |
|                                                                    |                           |                           | % gesamt | 10,0%                      | 2,5%            | 0,0%             | 0,0%  | 12,5%  |
|                                                                    | 4                         | Anzahl                    | 39       | 15                         | 13              | 2                |       | 69     |
|                                                                    |                           |                           | % gesamt | 19,5%                      | 7,5%            | 6,5%             | 1,0%  | 34,5%  |
|                                                                    | 5                         | Anzahl                    | 19       | 14                         | 1               | 0                |       | 34     |
|                                                                    |                           |                           | % gesamt | 9,5%                       | 7,0%            | 0,5%             | 0,0%  | 17,0%  |
|                                                                    | 6                         | Anzahl                    | 24       | 9                          | 1               | 0                |       | 34     |
|                                                                    |                           |                           | % gesamt | 12,0%                      | 4,5%            | 0,5%             | 0,0%  | 17,0%  |
|                                                                    | Total                     | Anzahl                    | 133      | 49                         | 16              | 2                |       | 200    |
|                                                                    |                           |                           | % gesamt | 66,5%                      | 24,5%           | 8,0%             | 1,0%  | 100,0% |

2PN-Stadien und die Qualität der transferierten Embryonen die entscheidenden Kriterien waren.

Dadurch, dass mehr Embryonen kultiviert wurden, konnte die Anzahl der transferierten Embryonen gesenkt werden bei gleichzeitig höheren Schwangerschafts- und Geburtenraten. Dabei spielte nicht der Transfertag, sondern die Qualität der Embryonen die entscheidende Rolle. Dass die Qualität auch die entscheidende Rolle bei der kumulativen Lebendgeburtenrate im Rahmen des eSET spielt, konnte in einer anderen Arbeit ebenfalls nachgewiesen werden, wobei die Odds Ratio bei dem Vorhandensein von  $\geq 3$  Top-Embryonen 2,66 betrug [8].

Eine bessere Morphologie des Trophektoderms, ein niedrigeres Patientenalter und ein möglichst gutes Entwicklungsstadium der Blastozyste haben auch in einer amerikanischen Studie die klinische Schwangerschafts- und Lebendgeburtenrate am stärksten beeinflusst. Deshalb sollten in erster Linie die Morphologie des Trophektoderms und das Blastozystenstadium dazu benutzt werden, den besten Embryo für den Transfer auszuwählen. Das Blastozystenstadium war mit Lebendgeburtenraten von 50% (hatching), 49,5% (expanded) und 36,7% (early) assoziiert [9]. Auch in einer weiteren Studie konnte nachgewiesen werden, dass das Alter und die Zahl der Top-Embryonen signifikant mit dem Eintreten einer klinischen Schwangerschaft nach eSET assoziiert ist. Der eSET sollte außerdem laut dieser Studie vorzugsweise an Tag 3 durchgeführt werden [10].

Es müssen Handlungsalgorithmen entwickelt werden, um den Erfolg einer DMW-Behandlung vorhersagen zu können. Die Anzahl kultivierter 2PNER hatte einen stärkeren Einfluss auf die Gewinnung von Blastozysten als das Alter. Daraus folgt, dass gerade ältere Patientinnen durch die Einführung des DMW profitieren, wenn genug Eizellen gewonnen und kultiviert werden können. Es konnte gezeigt werden, dass die Kultur von 4 × 2PN-Stadien im Rahmen des DMW zu den höchsten Schwangerschaftsraten geführt hat. Insgesamt 14% der 32,5% erreichten Schwangerschaften

gingen auf die Kultur von 4 × 2PN-Stadien zurück. 12,5% der erreichten Schwangerschaften resultierten aus der Kultur von > 4 × 2PN-Stadien.

Dass die Kultur von 4 × 2PN-Stadien die höchste Schwangerschaftsrate erzielt, kann einerseits durch Patientinnen mit besserer Prognose erklärt werden. Andererseits wird dieser mögliche statistische Bias relativiert, denn in diese Gruppe fielen auch Patientinnen mit schlechterer Prognose, wenn die Anzahl an geplanten zu kultivierenden 2PN von 6 nicht erzielt werden konnte. Bei der Kultivierung von 2PN-Stadien im Sinne des DMW muss selbstverständlich immer in Betracht gezogen werden, dass überzählige Embryonen entstehen können, die dann mittels Vitrifikation einzufrieren sind. Da diese Rate möglichst gering ausfallen soll, muss nach sorgfältiger Anamnese und unter Einbezug vorheriger Stimulationen und Transfers – hier ist die Anzahl der transferierten Embryonen guter Qualität entscheidend – für jede Patientin individuell entschieden werden.

Einige Blutwerte und Medikamentengaben konnten als Prädiktoren identifiziert werden. Statistisch betrachtet war es vorteilhaft, einen möglichst hohen E<sub>2</sub>-Wert zu erzielen bei vorab gemessenem hohem AMH-Wert und ein möglichst niedriges LH, wenn viele Eizellen generiert werden sollten.

Hohe Dosen und folglich lange Stimulationen mit Urofollitropin + Lutropin und GnRH-Antagonisten konnten als negative Prädiktoren für die Eizellanzahl bestimmt werden. Dieses Patientinnenkollektiv wies niedrige AMH-Werte und eine schlechte ovarielle Antwort auf die Stimulation auf als Begründung für die lange Dauer der Stimulation unter Nutzung des Antagonisten-Protokolls. Dass ein langes Agonistenprotokoll, welches bis 2012 den Großteil der Stimulationen ausmachte, verglichen mit dem Antagonistenprotokoll besser zur Gewinnung einer größeren Anzahl reifer Follikel im Rahmen einer kontrollierten ovariellen Stimulation geeignet ist, konnten auch andere Arbeitsgruppen abbilden [11]. Deutlich spiegeln die Daten hinsichtlich der verwen-

deten FSH-Dosis den Shift vom Agonisten- zum Antagonistenprotokoll wider [12]. Außerdem konnte gezeigt werden, dass bei Anwendung des eSET höhere Implantationsraten (OR 1,36) und eine höhere Lebendgeburtsrate (OR 1,33) durch GnRH-Agonisten resultierten [13]. Klinisch besteht aufseiten des Agonistenprotokolls die Gefahr des ungebremst verlaufenden ovariellen Hyperstimulationssyndroms (OHSS), da zur finalen Eizellreifung hCG appliziert werden muss. Bei Anwendung des Antagonistenprotokolls lässt sich das Auftreten eines OHSS durch Nutzung des physiologischen LHs ausgelöst durch die Gabe eines GnRH-Agonisten stark reduzieren [14, 15]. Neben der absoluten Anzahl reifer Follikel zählen beim Vergleich von Agonisten- und Antagonistenprotokoll weitere wichtige klinische Parameter: klinische und fortlaufende Schwangerschaft, Abortrate, Lebendgeburtsrate. Für diese Parameter konnten bislang keine signifikanten Unterschiede zwischen den Protokollen manifestiert werden [15].

Gleichzeitig darf nicht vergessen werden, dass nicht jede Patientin automatisch von einem Blastozystentransfer profitiert. Bisher konnte zwar nachgewiesen werden, dass es einen leicht signifikanten Vorteil hinsichtlich der Lebendgeburtsrate gab, wenn an Tag 5–6 ein Blastozystentransfer stattfand, gleichzeitig konnten aber bei Transfers an Tag 2–3 kumulativ höhere Schwangerschaftsraten erzielt werden [16]. Dieses Resultat sei dadurch erklärbar, dass einerseits im Rahmen der klassischen ART-Zyklen mehr Kryotransfers stattgefunden haben und andererseits die Rate an abgebrochenen Behandlungen im Sinne der Absage eines Transfers geringer gewesen sei [16]. Gerade bei Patientinnen mit einer geringen ovariellen Reserve bzw. einer schlechten Prognose sollte der Einsatz des eSET kritisch betrachtet werden, da diese Patientinnen z.T. mit einem schlechteren Behandlungsergebnis rechnen müssten [17].

Im Rahmen des eSET konnte die American Society for Reproductive Medicine (ASRM) bereits 2012 folgende Feststellungen machen: eSET sollte vor allem Patientinnen mit einer guten Prognose bzw. Empfängerinnen von Eizellspenden angeboten werden. IVF-Zentren sollten den eSET nur vorantreiben, wenn die Patienten angemessen informiert sind. Fortschritte im Bereich der Embryonenselektion, z.B. durch Time-Lapse-Verfahren, sollten außerdem die Anwendung des eSET erhöhen [18].

Umso wichtiger ist es, eine gut informierte und vor allem individualisierte Entscheidung zu treffen, ob die Anwendung des DMWs bei einer individuellen Patientin sinnvoll ist.

Die Datenerhebung war retrospektiv und unizentrisch, womit die Übertragbarkeit auf andere Zentren nur eingeschränkt möglich ist. Methodisch gesehen bot es einen Vorteil, den vorangegangenen Therapiezyklus einer Patientin mit dem darauffolgenden Zyklus zu vergleichen, da dadurch eine interne Kontrolle stattfinden konnte. Nichtsdestotrotz hat dieses Verfahren die Ergebnisse auch beeinflusst, da nur Patientinnen eingeschlossen wurden, die noch in mindestens einem weiteren Zyklus behandelt wurden. Patientinnen, die direkt im 1. Zyklus im Sinne des DMW behandelt wurden, wobei es sofort zum Eintreten einer Schwangerschaft kam, wurden somit ausgeschlossen. Dies erklärt die extrem niedrigen Schwangerschaftsraten der Vorzyklen sowohl in der KG als auch in der EG, die dementsprechend auch nicht dem normalen Durchschnitt des DIR und auch des eigenen Zentrums entsprechen, da methodenbedingt fast ausschließlich Patientinnen eingeschlossen wurden, die im 1. Therapiezyklus nicht schwanger geworden waren, bzw. einen Abort hatten.

Zusätzlich wurden durch das Auswahlverfahren gerade ältere Patientinnen (KG2 = 37, EG2/DMW = 36,5 Jahre) mit vergleichsweise vielen Zyklen betrachtet (KG = 3,76, EG = 3,75 ART-Zyklen pro

Patientin) und einem langjährig bestehendem Kinderwunsch (KW) (KG2 =  $3,65 \pm 2,28$ , EG2/DMW =  $4,96 \pm 2,36$ ). Zum Teil führten frühere Kinderwunschbehandlungen bereits zum Erfolg. 28,5% der Frauen in KG2 hatten bereits Kinder und 22,5% der DMW-Gruppe. In KG2 waren davon 16% auf eine erfolgreiche KW-Behandlung zurückzuführen, in der DMW-Gruppe 12,5%.

Wenn man nun damit von einem Patientinnenkollektiv ausgeht, dass vergleichsweise lange bis zum Eintreten einer Schwangerschaft gebraucht hat und stark negativ selektiert ist, sind die Schwangerschafts- und Geburtenraten in der DMW-Gruppe sehr vielversprechend und sprechen für einen höheren Erfolg der Therapie bei geändertem Vorgehen.

Die Ergebnisse konnten darlegen, dass einzelne Patientinnen von dem Verfahren profitiert haben. Die Gruppen hatten allerdings mit 61 vs. 70 Schwangerschaften (31 vs. 35% Schwangerschaftsrate) zu geringer statistischer Power, um darzulegen, dass die EG signifikant im Gegensatz zur KG profitiert. Letzten Endes konnten hier nur Trends in Richtung des DMW aufgezeigt werden, was durch eine Betrachtung eines größeren Kollektivs oder der reinen Betrachtung von einzelnen Zyklen gelöst werden könnte. Da aber in beiden Gruppen nur Zyklen betrachtet wurden, bei denen auch ein Embryotransfer stattfand, sind gerade unsere Ergebnisse hinsichtlich der Zielparameter (Qualität der Embryonen, Schwangerschaftsrate usw.) sehr konstant.

Dass die Rate an Mehrlingsschwangerschaften durch den DMW sinkt, konnten wir aufgrund eines zu kleinen Patientinnenkollektivs nicht darstellen.

Bereits 2006 wurde in einer niederländischen Studie suggeriert, dass eSET möglichst bei allen Patienten angewendet werden sollte, um Mehrlingsschwangerschaften zu verhindern. Damals fand sich allerdings die Schwangerschaftsrate gleichzeitig halbiert [19].

Inzwischen konnte bewiesen werden, dass gerade Patientinnen, die älter als 35 Jahre sind und eine Behandlung im Sinne des eSET und erweiterter Embryonenselektion im Sinne eines genetischen Screenings vor Embryotransfer bekommen, signifikant seltener mit Mehrlingen schwanger wurden (6,8 vs. 21%) und es gleichzeitig zu einer signifikant höheren Lebendgeburtsrate pro Embryotransfer (17 vs. 10,6%) kam. Allerdings war es für diese Studie nötig, eine erweiterte Politik hinsichtlich der Embryonenselektion, ein optimiertes Kultursystem, Kryokonservierung und ein Aneuploidie-Screening an Blastozysten mit Analyse von 24 Chromosomen einzusetzen [20].

Dass Mehrlingsschwangerschaften durch eSET im Gegensatz zum Double Embryo Transfer (DET) mit einer Rate von 35% Mehrlingsschwangerschaften deutlich reduziert werden können, konnte inzwischen auch dargestellt werden [21].

Auch andere Arbeitsgruppen konnten die Sinnhaftigkeit des eSET durch Risikominimierung bei gleichbleibenden Erfolgen der IVF-Behandlung darlegen [22].

Doch was ist zu tun, wenn die Patienten trotz des Risikos einer Mehrlingsschwangerschaft auf den Transfer mehrerer Embryonen bestehen, um die Chance auf eine Schwangerschaft innerhalb eines Behandlungsversuchs zu erhöhen bzw. sich bewusst für die Geburt von Zwillingen entscheiden? Die Patienten sollten durch das Konzept des Shared-Decision-Making dazu befähigt werden, eine autonome Entscheidung treffen zu können. Dazu sollten sie möglichst gut über die Risiken einer Mehrlingsschwangerschaft und die finanzielle Mehrbelastung aufgeklärt werden [23].

Im Laufe der Behandlung ändere sich aber auch die Einstellung der Patienten im Bezug auf eine Zwillingsschwangerschaft. Die

Präferenz werde in der Regel angepasst. Während bereits schwangere Patienten eher das präferieren, was sie erwarten (Einling oder Zwilling), präferieren Patienten vor dem Embryotransfer zu einem höheren Prozentsatz eine Zwillingschwangerschaft, um ihren Kinderwunsch möglichst bald zu erfüllen [24]. Hier zeigt sich, dass eine ausführliche Beratung von hoher Wichtigkeit ist.

Zusammenfassend lässt sich sagen, dass der DMW die Schwangerschaftswahrscheinlichkeit erhöht. Die ursprüngliche Intention, bei verbesserten Schwangerschaftsraten auch das Mehrlingsrisiko mit den damit verbundenen gesundheitlichen, persönlichen und finanziellen Implikationen zu verringern, lässt sich aber nur umsetzen, wenn die Anzahl der transferierten Embryonen weiter reduziert wird.

Nordeuropa, Australien und Japan sind immer stärker darum bemüht, den eSET dauerhaft zu etablieren, um die hohe Rate an Mehrlingsschwangerschaften zu reduzieren, bei gleichzeitig weiterhin hohen Schwangerschaftsraten. Länder wie Schweden, Finnland und Belgien haben gezeigt, dass die Rate an Mehrlingsschwangerschaften auf unter 10% reduziert werden kann bei ansonsten tendenziell gleichbleibenden Raten an Mehrlingen von ~20% in vielen europäischen Ländern [25,26]. In Schweden sind Reproduktionsmediziner dazu verpflichtet, nur einen Embryo zu transferieren, wenn nicht außergewöhnliche Umstände vorliegen. In Belgien muss der 1. Zyklus einer weniger als 36 Jahre alten Patientin ein eSET sein. In Finnland gibt es bisher keine gesetzlichen Maßgaben [27].

In Deutschland gilt weiterhin, dass keine routinemäßige Vorratshaltung an Embryonen beabsichtigt stattfinden soll.

Durch die Anwendung des DMW hätten nun auch deutsche Reproduktionsmediziner die Möglichkeit, höhere Schwangerschaftsraten bei reduziertem Mehrlingsrisiko zu erzielen, doch lässt sich dies nur umsetzen, wenn dabei in Kauf genommen wird, überzählige entwicklungsfähige Embryonen einzufrieren. Initial wird mit der Intention gehandelt, der Patientin nach eingehender, individueller Aufklärung und Zustimmung einen entwicklungsfähigen Embryo unter Berücksichtigung der Erfahrungen aus vorherigen ART-Zyklen zu transferieren. Da sich die Qualität der in der Stimulation herangereiften Eizellen durchaus von Zyklus zu Zyklus unterscheiden kann, muss die Patientin über die Notwendigkeit des Einfrierens entwicklungsfähiger Embryonen aufgeklärt sein, falls sich die für die Kultur avisierte Anzahl zur Übertragung eines entwicklungsfähigen Embryos als zu hoch erweisen sollte.

Das ESchG von 1990 ist auch in diesem Punkt dringend reformationsbedürftig. Da nur der Gesetzgeber die Möglichkeit hat, diese elementaren Fragen am Beginn des menschlichen Lebens zu regeln, sollte ein dem Stand der medizinischen Forschung und Wissenschaft entsprechendes Fortpflanzungsmedizinengesetz, das nicht als Mediator für die unbegrenzte Embryonenkultur und -vorratshaltung angesehen werden darf, dringend auf den Weg gebracht werden.

## Schlussfolgerung

Der DMW ist eine gute Möglichkeit, gerade bei Patientinnen mit einer ausreichenden ovariellen Reserve die Schwangerschaftsrate zu erhöhen. Er sollte dann in Betracht gezogen werden, wenn genügend Eizellen generiert werden können, da Patientinnen signifikant von dem Transfer weniger Embryonen mit möglichst hoher Qualität profitieren.

## Danksagung

Wir bedanken uns bei .05 Statistikberatung – Diplom-Psychologen Hoffmann Ostapczuk Ullrich Partnerschaftsgesellschaft, Düsseldorf, für die statistische Analyse und Hilfestellung.

## Interessenkonflikt

Die Autoren erklären, dass kein Interessenkonflikt besteht.

## Literatur

- 1 Snick HK, Snick TS, Evers JL et al. The spontaneous pregnancy prognosis in untreated subfertile couples: the Walcheren primary care study. *Hum Reprod* 1997; 12: 1582–1588
- 2 Diedrich K, Strowitzki T, Kantenich H. Stand der Reproduktionsmedizin in Deutschland. *Geburtsh Frauenheilk* 2010; 70: 355–360
- 3 Bundesministerium der Justiz. Gesetz zum Schutz von Embryonen (Embryonenschutzgesetz – ESchG). Embryonenschutzgesetz vom 13. Dezember 1990 (BGBl. I S. 2746), das zuletzt durch Artikel 1 des Gesetzes vom 21. November 2011 (BGBl. I S. 2228) geändert worden ist
- 4 Bals-Pratsch M, Frommel M. Wandel in der Implementation des Deutschen Embryonenschutzgesetzes. *J Reproduktionsmed Endokrinol* 2010; 7: 87–95
- 5 Frommel M. Deutscher Mittelweg in der Anwendung des Embryonenschutzgesetzes (ESchG) mit einer an den aktuellen wissenschaftlichen Kenntnisstand orientierten Auslegung der für die Reproduktionsmedizin zentralen Vorschrift des § 1, Abs. 1, Nr. 5 ESchG. *J Reproduktionsmed Endokrinol* 2007; 4: 27–33
- 6 Cupisti S, Muller A, Hildebrandt T et al. Culture of individually required number of 2-pronuclei-stage oocytes – patient participation in decision-making is in accordance with the aim of avoiding surplus embryo freezing. *Geburtsh Frauenheilk* 2014; 74: 157–160
- 7 Das Jahrbuch des Deutschen IVF-Registers 2013. *J Reproduktionsmed Endokrinol* 2014; 11: 6–51
- 8 Niinimäki M, Veleza Z, Martikainen H. Embryo quality is the main factor affecting cumulative live birth rate after elective single embryo transfer in fresh stimulation cycles. *Eur J Obstet Gynecol Reprod Biol* 2015; 194: 131–135
- 9 Thompson SM, Onwubalili N, Brown K et al. Blastocyst expansion score and trophectoderm morphology strongly predict successful clinical pregnancy and live birth following elective single embryo blastocyst transfer (eSET): a national study. *J Assist Reprod Genet* 2013; 30: 1577–1581
- 10 Sifer C, Sermondade N, Poncelet C et al. Biological predictive criteria for clinical pregnancy after elective single embryo transfer. *Fertil Steril* 2011; 95: 427–430
- 11 Shrestha D, La X, Feng HL. Comparison of different stimulation protocols used in vitro fertilization: a review. *Ann Transl Med* 2015; 3: 137
- 12 Das Jahrbuch des Deutschen IVF-Registers 2011. *J Reproduktionsmed Endokrinol* 2012; 9: 453–484
- 13 Grow D, Kawwass JF, Kulkarni AD et al. GnRH agonist and GnRH antagonist protocols: comparison of outcomes among good-prognosis patients using national surveillance data. *Reprod Biomed Online* 2014; 29: 299–304
- 14 Devroey P, Polyzos NP, Blockeel C. An OHSS-free clinic by segmentation of IVF treatment. *Hum Reprod* 2011; 26: 2593–2597
- 15 Al-Inany HG, Yousseff MA, Aboulghar M et al. Gonadotrophin-releasing hormone antagonists for assisted reproductive technology. *Cochrane Database Syst Rev* 2011; 5: CD001750
- 16 Glujovsky D, Blake D, Farquhar C et al. Cleavage stage versus blastocyst stage embryo transfer in assisted reproductive technology. *Cochrane Database Syst Rev* 2012; 7: CD002118
- 17 Gleicher N, Kushnir VA, Barad DH. Is it time for a paradigm shift in understanding embryo selection? *Reprod Biol Endocrinol* 2015; 13: 3
- 18 Practice Committee of Society for Assisted Reproductive Technology; Practice Committee of American Society for Reproductive Medicine. Elective single-embryo transfer. *Fertil Steril* 2012; 97: 835–842

- 19 van Montfoort AP, Fiddelaers AA, Janssen JM et al. In unselected patients, elective single embryo transfer prevents all multiples, but results in significantly lower pregnancy rates compared with double embryo transfer: a randomized controlled trial. *Hum Reprod* 2006; 21: 338–343
- 20 Ubaldi FM, Capalbo A, Colamaria S et al. Reduction of multiple pregnancies in the advanced maternal age population after implementation of an elective single embryo transfer policy coupled with enhanced embryo selection: pre- and post-intervention study. *Hum Reprod* 2015; 30: 2097–2106
- 21 Prados N, Quiroga R, Caligara C et al. Elective single versus double embryo transfer: live birth outcome and patient acceptance in a prospective randomised trial. *Reprod Fertil Dev* 2015; 27: 794–800
- 22 Ismail L, Mittal M, Kalu E. IVF twins: buy one get one free? *J Fam Plann Reprod Health Care* 2012; 38: 252–257
- 23 Ezugwu E, der Burg SV. Debating elective single embryo transfer after in vitro fertilization: a plea for a context-sensitive approach. *Ann Med Health Sci Res* 2015; 5: 1–7
- 24 Fiddelaers AA, Nieman FH, Dumoulin JC et al. During IVF treatment patient preference shifts from singletons towards twins but only a few patients show an actual reversal of preference. *Hum Reprod* 2011; 26: 2092–2100
- 25 Kupka MS, Ferraretti AP, de Mouzon J et al.; European IVF-Monitoring Consortium, for the European Society of Human Reproduction and Embryology. Assisted reproductive technology in Europe, 2010: results generated from European registers by ESHRE†. *Hum Reprod* 2014; 29: 2099–2113
- 26 European IVF-Monitoring Consortium (EIM); European Society of Human Reproduction and Embryology (ESHRE), Kupka MS, D'Hooghe T et al. Assisted reproductive technology in Europe, 2011: results generated from European registers by ESHRE. *Hum Reprod* 2016; 31: 233–248
- 27 Harbottle S, Hughes C, Cutting R et al.; Association of Clinical Embryologists & The (ACE) British Fertility Society (BFS). Elective single embryo transfer: an update to UK Best Practice Guidelines. *Hum Fertil (Camb)* 2015; 18: 165–183
